# Supplementary material for: Newly synthesized sulfonamide derivatives explored for DNA binding, enzyme inhibitory, and cytotoxicity activities: a mixed computational and experimental analyses
Source: Royal Society of Chemistry journal article supplement (doi:10.1039/d4ra06412g), 2024-01-01
Supplement: d4ra06412g1.pdf [file d4ra06412g1.pdf]

## Supplementary material

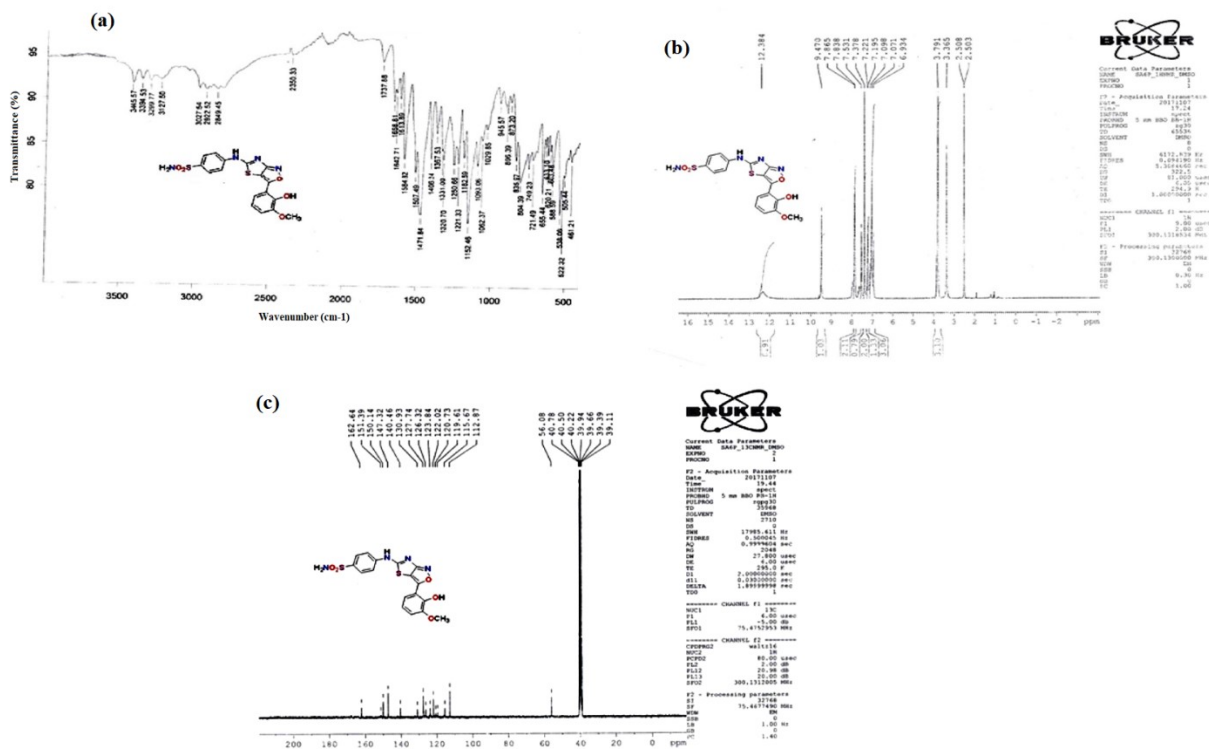

Fig. S1. (a) IR, (b) <sup>1</sup>H-NMR, and (c) <sup>13</sup>C-NMR spectra of YM-1.



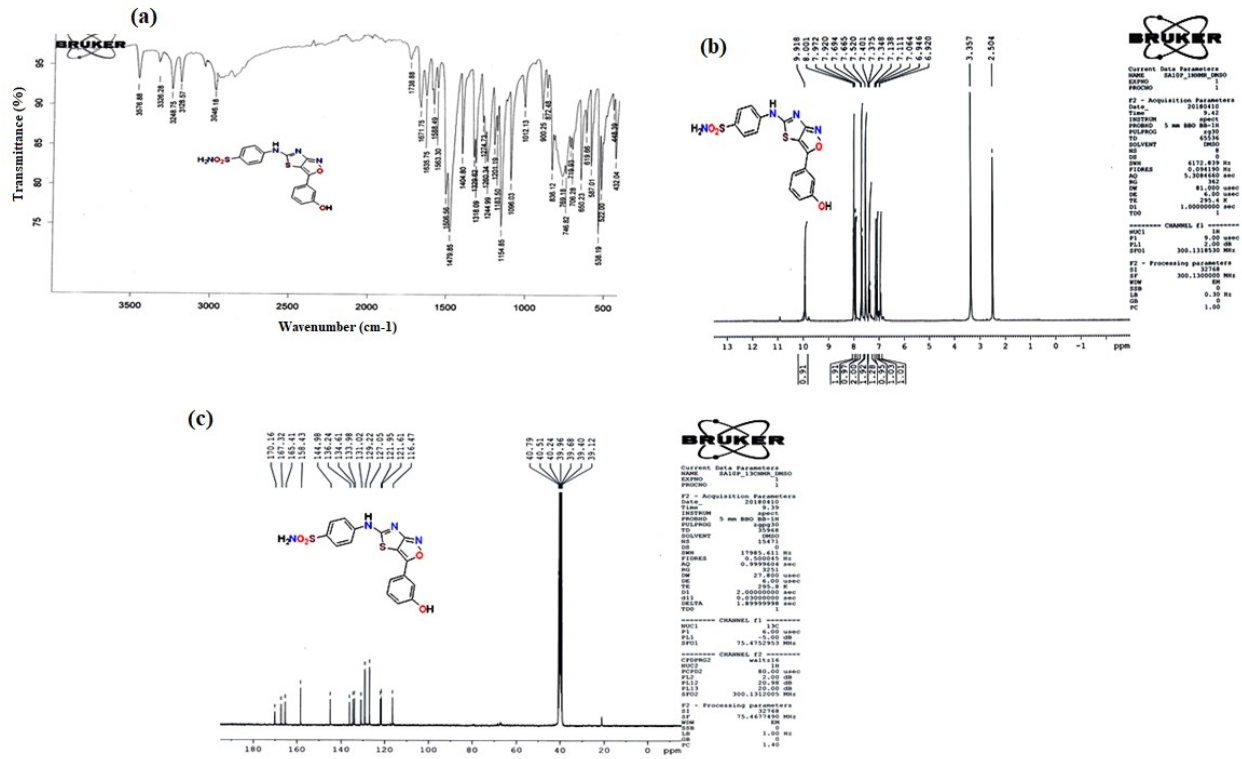

Fig. S3. (a) IR, (b) <sup>1</sup>H-NMR, and (c) <sup>13</sup>C-NMR spectra of YM-3.

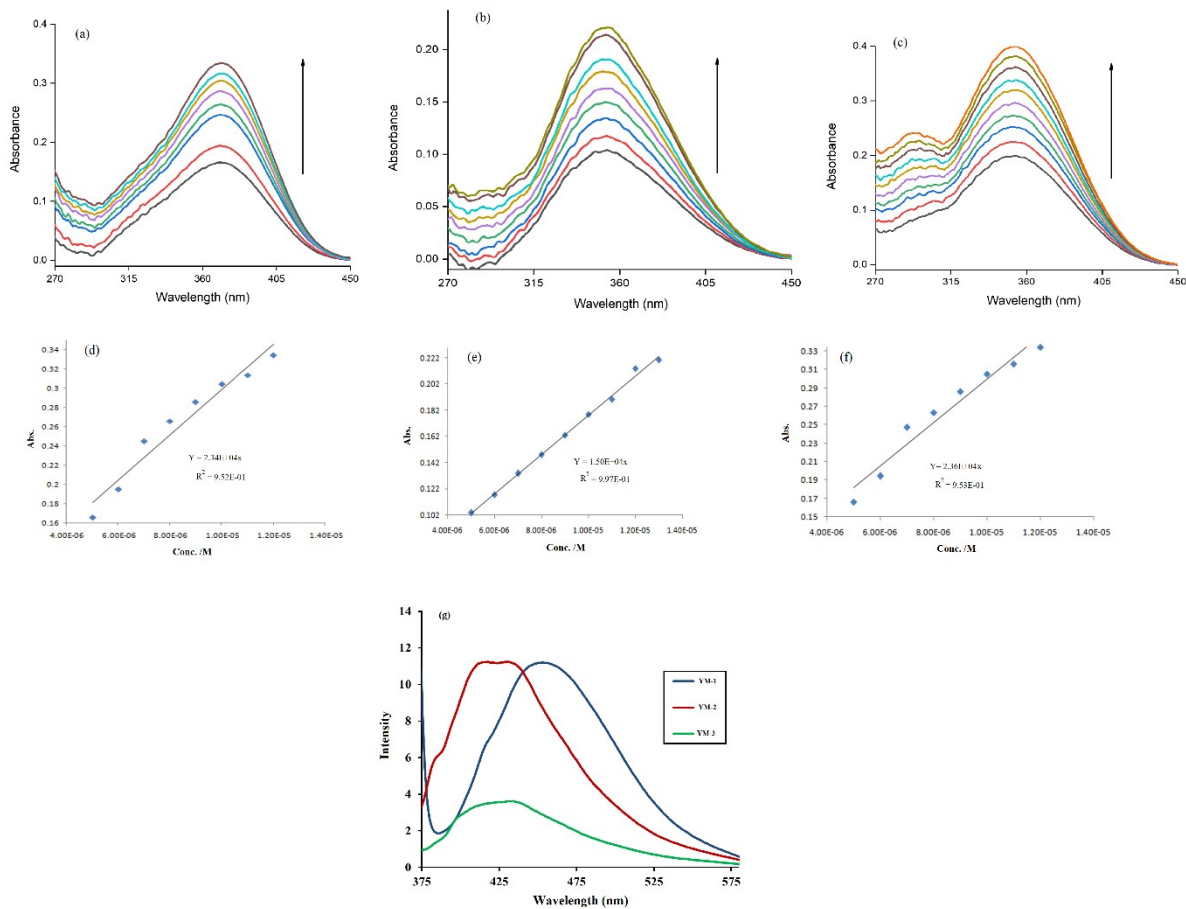

**Fig. S4.** (a-c) Concentration profiles: (a) YM-1, (b) YM-2, and (c) YM-3. (d-f) Concentrations of YM-1, YM-2, and YM-3 plotted against absorbance for calculation of molar extinction coefficient. (g) Overlay of Fluorescence-emission spectrum of sulfanilamide derivatives.

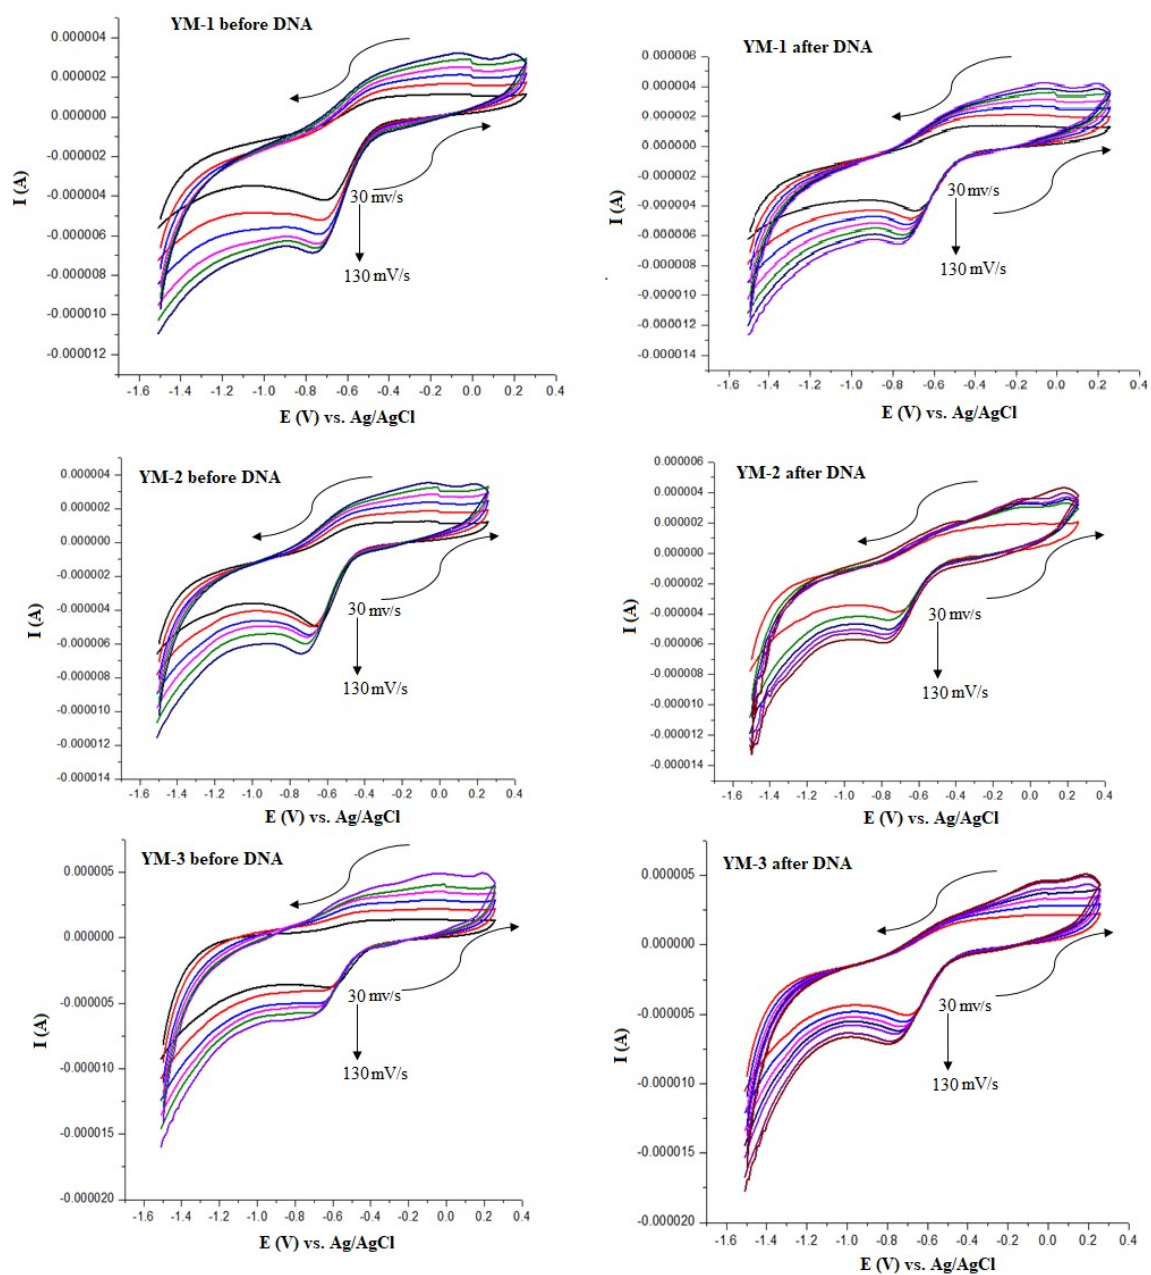

**Fig. S5.** Cyclic voltammogram YM-1, YM-2, and YM-3 without and in the presence of ds-DNA at various scan rates.

| Conc uM | Thiourea |        |          | YM-1  |       |       | YM-2  |       |       | YM-3  |       |          |
|---------|----------|--------|----------|-------|-------|-------|-------|-------|-------|-------|-------|----------|
| 100     | 96.21    | 97.04  | 95.38    | 52.9  | 54.92 | 50.01 | 55.75 | 58.42 | 59.61 | 48.3  | 49.97 | 49.23    |
| 75      | 90.62    | 89.28  | 90.31    | 38.48 | 38.64 | 36.82 | 43.74 | 45.39 | 45.39 | 37.19 | 38.02 | 36.36    |
| 50      | 85.55    | 88.51  | 86.29    | 35.12 | 34.03 | 34.89 | 36.08 | 38.51 | 39.32 | 31.46 | 30.36 | 31.23    |
| 25      | 82.16    | 81.33  | 81.33    | 15.34 | 16.99 | 16.16 | 26.38 | 29.69 | 31.34 | 14.05 | 14.88 | 16.53    |
| 12.5    | 60.67    | 59.85  | 59.02    | 4.85  | 6.5   | 6.5   | 7.63  | 9.28  | 10.11 | 3.56  | 5.22  | 2.74     |
|         |          |        |          |       |       |       |       |       |       |       |       |          |
|         |          |        |          |       |       |       |       |       |       |       |       |          |
| LogIC50 | 0.9067   | 0.9354 | 0.9366   | 1.976 | 1.967 | 2.015 | 1.931 | 1.891 | 1.878 | 2.023 | 2.012 | 2.023    |
|         |          | Avg    | 0.926233 |       | Avg   | 1.986 |       | Avg   | 1.9   |       | Avg   | 2.019333 |

**Fig. S6.** Urease inhibition data for the evaluation of IC<sub>50</sub> values.

| YM1         |                   |                |
|-------------|-------------------|----------------|
| [Compund]   | Cancereous MG-U87 | Normal HEK-293 |
| 40µM        | 84.629781         | 65.97977       |
| 80µM        | 87.691258         | 70.25695       |
| 120µM       | 90.38390667       | 50.28022       |
| 200µM       | 90.53894667       | 68.34092       |
| 400µM       | 95.40420667       | 91.11583       |
| <b>IC50</b> | <b>1.154</b>      | <b>15.29</b>   |
| <b>SD</b>   | <b>0.317</b>      | <b>0.9259</b>  |
| YM2         |                   |                |
| [Compund]   | Cancereous MG-U87 | Normal HEK-293 |
| 40µM        | 71.542864         | 70.368754      |
| 80µM        | 87.10594333       | 86.55539       |
| 120µM       | 87.64110333       | 86.783         |
| 200µM       | 87.24621333       | 87.04603       |
| 400µM       | 89.21004          | 88.87709       |
| <b>IC50</b> | <b>7.024</b>      | <b>7.938</b>   |
| <b>SD</b>   | <b>0.374</b>      | <b>0.3448</b>  |
| YM3         |                   |                |
| [Compund]   | Cancereous MG-U87 | Normal HEK-293 |
| 40µM        | 69.82281333       | 70.23675       |
| 80µM        | 61.86046667       | 86.64138       |
| 120µM       | 67.52307          | 86.91958       |
| 200µM       | 72.46585333       | 87.44057       |
| 400µM       | 87.31635333       | 89.92413       |
| <b>IC50</b> | <b>9.512</b>      | <b>9.304</b>   |
| <b>SD</b>   | <b>0.6682</b>     | <b>0.2864</b>  |

**Fig. S7.** Dose dependent % cytotoxicity data for the evaluation of IC<sub>50</sub> values.
